# Supplementary material for: pH-dependent adsorption of the sulfamethoxazole antibiotic on HKUST-1@CNS nanocomposite corroborating efficiency, mechanistic, and kinetic studies
Source: Royal Society of Chemistry journal article supplement (doi:10.1039/d3nj04424f), 2024-01-01
Supplement: d3nj04424f1.pdf [file d3nj04424f1.pdf]

### Supporting Information

**pH-dependent adsorption characteristics of antibiotic on HKUST-1@CNS  
nanocomposite corroborating efficiency, mechanism, and kinetics studies**

**Geetika Jain,<sup>a</sup> Puja Bhattacharyya,<sup>a</sup> Mrinal Kanti Mandal,<sup>b</sup> Rajib Ghosh Chaudhuri,<sup>b</sup>  
Sandip Chakrabarti,<sup>a\*</sup>**

<sup>a</sup> Amity Institute of Nanotechnology Amity University Noida, UP 201313, India

<sup>b</sup> Department of Chemical Engineering, National Institute of Technology Durgapur, WB  
713209, India

Email: [schakrabarti@amtiy.edu](mailto:schakrabarti@amtiy.edu)

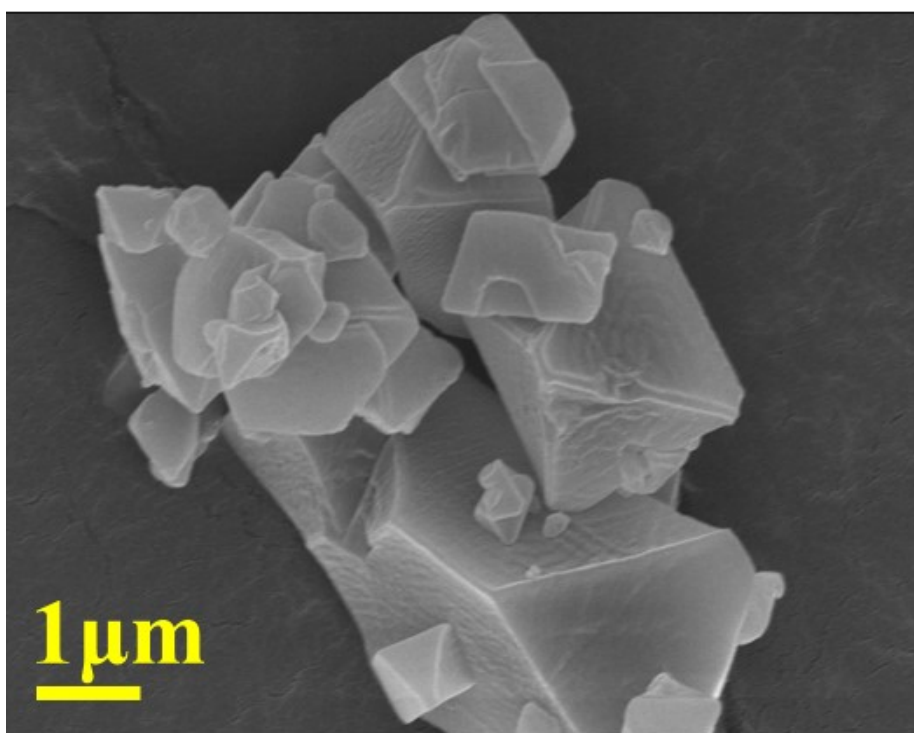

Figure S1: FESEM image of HKUST-1 (pristine)

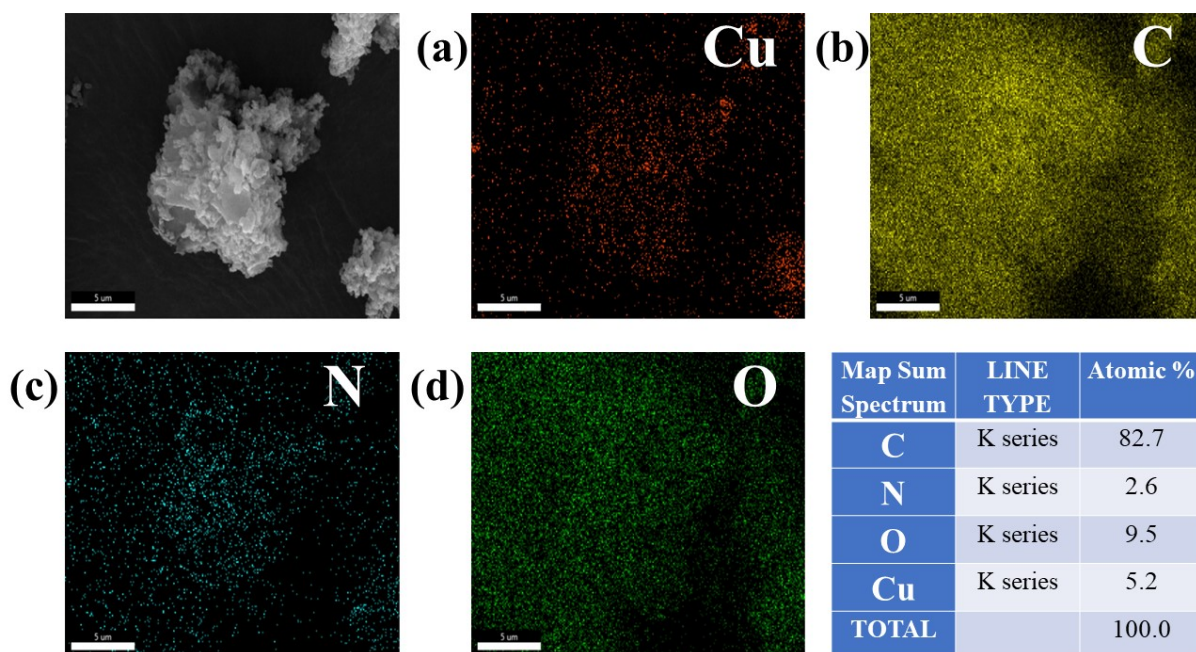

Figure S2: EDAX OF HKUST-1@CNS nanocomposite with its elemental mapping

Table S1: Comparison of HKUST-1@CNS with other reported materials for SMX adsorption

| S.No. | Material                        | SMX Removal efficiency (%)       | Time for achieving adsorption (h) | Adsorbate concentration | Adsorbent Dosage | pH of SMX | other targeted antibiotics                     | Reference        |
|-------|---------------------------------|----------------------------------|-----------------------------------|-------------------------|------------------|-----------|------------------------------------------------|------------------|
| 1.    | HKUST-1@CNS                     | 96.1                             | 1.5                               | 50mg/L                  | 20mg             | 7         | Tetracycline, Ciprofloxacin and Nalidixic acid | <b>This work</b> |
| 2.    | Ball milled biochar             | 75                               | 24                                | 10mg/L                  | 10mg             | 7         | Sulfapyridine                                  | <b>1</b>         |
| 3.    | CLDH                            | 93                               | 1                                 | 500mg/L                 | 30mg             | 7         | -                                              | <b>2</b>         |
| 4.    | Zeolite                         | 75.49                            | 24                                | 1g/L                    | 1000 mg          |           | Ofloxacin                                      | <b>3</b>         |
| 5.    | GO                              | 30                               | 24                                | 10mg/L                  | 100mg/L          | 7         | Diclofenac                                     | <b>4</b>         |
| 6.    | Activated alumina, PAC, and GAC | 15.5, 73.4, and 34, respectively | 2                                 | 20mg/L                  | 5g/L             | 7         | -                                              | <b>5</b>         |
| 7.    | TW-SO <sub>3</sub> H            | ~60                              | 6                                 | 100mg/L                 | 10mg             | 7         | Bisphenol A                                    | <b>6</b>         |

## References:

- 1 J. Huang, A. R. Zimmerman, H. Chen and B. Gao, *Environmental Pollution*, 2020, **258**, 113809.
- 2 E. H. Mourid, M. Lakraimi, L. Benaziz, E. H. Elkhatabi and A. Legrouri, *Applied Clay Science*, 2019, **168**, 87–95.
- 3 Y. Liu, X. Liu, S. Lu, B. Zhao, Z. Wang, B. Xi and W. Guo, *Chemical Engineering Journal*, 2020, **384**, 123346.
- 4 S. W. Nam, C. Jung, H. Li, M. Yu, J. R. V. Flora, L. K. Boateng, N. Her, K. D. Zoh and Y. Yoon, *Chemosphere*, 2015, **136**, 20–26.
- 5 P. Motwani, R. K. Vyas, M. Maheshwari and S. Vyas, *Nature Environment and Pollution Technology*, 2011, **10**, 51–58.
- 6 M. A. Ahsan, M. T. Islam, C. Hernandez, H. Kim, Y. Lin, M. L. Curry, J. Gardea-Torresdey and J. C. Noveron, *Journal of Environmental Chemical Engineering*, 2018, **6**, 4215–4225.
